# Supplementary material for: Paternity Acknowledgment in 2 Million Birth Records from Michigan
Source: PLOS journal article supplement (doi:10.1371/journal.pone.0070042), 2013-07-22
Supplement: S1 (10.1371/journal.pone.0070042.s001) [file journal.pone.0070042.s001]

**Table S 1.** Determinants of Paternity Acknowledgement and Marriage at Childbirth, Michigan Births, 1993-2006

|                               | All Covariates |          |           |          | Child Gender Only |       |           |       |
|-------------------------------|----------------|----------|-----------|----------|-------------------|-------|-----------|-------|
|                               | Pat. Ack.      |          | Both Par. |          | Pat. Ack.         |       | Both Par. |       |
|                               | RRR            | z        | RRR       | z        | RRR               | z     | RRR       | z     |
| Child is Male                 | 1.023***       | 4.335    | 0.984***  | -3.007   | 1.035***          | 6.855 | 1.025***  | 6.025 |
| Born on Weekend               | 0.978***       | -3.672   | 0.955***  | -7.393   |                   |       |           |       |
| Any Abnorm. Cond./Cong. Anom. | 0.924***       | -8.461   | 0.981**   | -2.127   |                   |       |           |       |
| Birth Weight (kg)             | 1.088***       | 20.719   | 1.312***  | 66.110   |                   |       |           |       |
| Mother's Age: 20-24           | 1.113***       | 14.465   | 3.457***  | 133.151  |                   |       |           |       |
| Mother's Age: 25-34           | 1.152***       | 16.116   | 12.100*** | 248.653  |                   |       |           |       |
| Mother's Age: 35-44           | 1.112***       | 7.441    | 15.190*** | 195.526  |                   |       |           |       |
| Mother's Age: 45+             | 0.986          | -0.099   | 18.219*** | 24.554   |                   |       |           |       |
| Mother's Ed: HS Degree        | 1.519***       | 63.926   | 2.466***  | 129.671  |                   |       |           |       |
| Mother's Ed: Some College     | 1.890***       | 74.199   | 4.918***  | 188.241  |                   |       |           |       |
| Mother's Ed: College+         | 2.105***       | 46.957   | 21.536*** | 220.659  |                   |       |           |       |
| Mother's Ed: Missing          | 1.071***       | 3.372    | 2.315***  | 43.239   |                   |       |           |       |
| Mother is Black               | 0.286***       | -216.056 | 0.060***  | -444.230 |                   |       |           |       |
| Mother is Hispanic            | 1.128***       | 10.412   | 0.936***  | -5.424   |                   |       |           |       |
| Mother is American Indian     | 0.982          | -0.607   | 0.421***  | -26.884  |                   |       |           |       |
| Mother is Other Race          | 0.779***       | -10.884  | 1.553***  | 21.951   |                   |       |           |       |
| Second Parity                 | 0.916***       | -13.159  | 1.474***  | 58.829   |                   |       |           |       |
| Third Parity                  | 0.780***       | -29.061  | 1.270***  | 29.274   |                   |       |           |       |
| Fourth or Higher Parity       | 0.630***       | -46.738  | 0.982*    | -1.916   |                   |       |           |       |
| Birth Year                    | 1.092***       | 132.970  | 1.015***  | 22.767   |                   |       |           |       |
| N                             | 1,859,473      |          | 1,859,473 |          | 1,859,473         |       | 1,859,473 |       |

Notes: Relative risk ratios (RRR) from multinomial logit models are reported. Outcome base = Unmarried, No Paternity Acknowledgement (16.5% of all births). Outcomes: "Pat. Ack." = Paternity Acknowledgement (18.2% of all births); "Both Par." = Both Parents on Birth Certificate (65.3% of all births). The sample of analysis is the universe of births in Michigan over 1993-2006. Standard errors are robust to heteroskedasticity. "Mother is Other Race" includes unknown. Omitted categories: mother's age < 20; mother's education < HS; mother's race/ethnicity is white; first parity. Significance levels: \*p < 0.10 \*\*p < 0.05 \*\*\*p < 0.01
