# Supplementary material for: Paternity Acknowledgment in 2 Million Birth Records from Michigan
Source: PLoS One. 2013 Jul 22;8(7):e70042. doi: 10.1371/journal.pone.0070042 (PMC3718738; doi:10.1371/journal.pone.0070042)
Supplement: Table S2 — Determinants of Paternity Acknowledgement at Childbirth: By Separate Dimensions of Socio-Economic Status and Health. Notes: Each column is from a separate regression. Relative risk ratios (RRR) from multinomial logit models are reported, with z-scores below. Outcome base Both Parents on Birth Certificate (65.3% of all births). The sample of analysis is the universe of births in Michigan over 1993–2006. Standard errors are robust to heteroskedasticity. “Mother is Other Race” includes unknown. Omitted categories: mother's age 20; mother's education HS; mother's race/ethnicity is white; first parity. Significance levels: *p 0.10 **p 0.05 ***p 0.01. (PDF) [file pone.0070042.s002.pdf]

**Table S 2.** Determinants of Paternity Acknowledgement at Childbirth: By Separate Dimensions of Socio-Economic Status and Health

|                               | <b>Outcome: Paternity Acknowledged (18.2% of all births)</b> |                    |                    |                      |                      |                      |                     |                      |                     |
|-------------------------------|--------------------------------------------------------------|--------------------|--------------------|----------------------|----------------------|----------------------|---------------------|----------------------|---------------------|
|                               | (1)                                                          | (2)                | (3)                | (4)                  | (5)                  | (6)                  | (7)                 | (8)                  | (9)                 |
| Child is Male                 | 1.010**<br>2.527                                             |                    |                    |                      |                      |                      |                     |                      |                     |
| Born on Weekend               |                                                              | 1.104***<br>21.306 |                    |                      |                      |                      |                     |                      |                     |
| Any Abnorm. Cond./Cong. Anom. |                                                              |                    | 0.956***<br>-6.362 |                      |                      |                      |                     |                      |                     |
| Birth Weight (kg)             |                                                              |                    |                    | 0.682***<br>-125.364 |                      |                      |                     |                      |                     |
| Mother's Age: 20-24           |                                                              |                    |                    |                      | 0.203***<br>-201.549 |                      |                     |                      |                     |
| Mother's Age: 25-34           |                                                              |                    |                    |                      | 0.038***<br>-417.396 |                      |                     |                      |                     |
| Mother's Age: 35-44           |                                                              |                    |                    |                      | 0.027***<br>-338.131 |                      |                     |                      |                     |
| Mother's Age: 45+             |                                                              |                    |                    |                      | 0.022***<br>-38.828  |                      |                     |                      |                     |
| Mother's Ed: HS Degree        |                                                              |                    |                    |                      |                      | 0.370***<br>-180.441 |                     |                      |                     |
| Mother's Ed: Some College     |                                                              |                    |                    |                      |                      | 0.193***<br>-267.706 |                     |                      |                     |
| Mother's Ed: College+         |                                                              |                    |                    |                      |                      | 0.035***<br>-364.184 |                     |                      |                     |
| Mother's Ed: Missing          |                                                              |                    |                    |                      |                      | 0.254***<br>-84.116  |                     |                      |                     |
| Mother is Black               |                                                              |                    |                    |                      |                      |                      | 4.890***<br>291.982 |                      |                     |
| Mother is Hispanic            |                                                              |                    |                    |                      |                      |                      | 2.335***<br>104.800 |                      |                     |
| Mother is American Indian     |                                                              |                    |                    |                      |                      |                      | 3.118***<br>49.841  |                      |                     |
| Mother is Other Race          |                                                              |                    |                    |                      |                      |                      | 0.431***<br>-56.576 |                      |                     |
| Second Parity                 |                                                              |                    |                    |                      |                      |                      |                     | 0.492***<br>-153.121 |                     |
| Third Parity                  |                                                              |                    |                    |                      |                      |                      |                     | 0.454***<br>-132.397 |                     |
| Fourth+ Parity                |                                                              |                    |                    |                      |                      |                      |                     | 0.514***<br>-93.799  |                     |
| Birth Year                    |                                                              |                    |                    |                      |                      |                      |                     |                      | 1.052***<br>106.372 |
| N                             | 1,859,473                                                    | 1,859,473          | 1,859,473          | 1,859,473            | 1,859,473            | 1,859,473            | 1,859,473           | 1,859,473            | 1,859,473           |

Notes: Each column is from a separate regression. Relative risk ratios (RRR) from multinomial logit models are reported, with z-scores below. Outcome base = Both Parents on Birth Certificate (65.3% of all births). The sample of analysis is the universe of births in Michigan over 1993-2006. Standard errors are robust to heteroskedasticity. "Mother is Other Race" includes unknown. Omitted categories: mother's age < 20; mother's education < HS; mother's race/ethnicity is white; first parity. Significance levels: \*p < 0.10 \*\*p < 0.05 \*\*\*p < 0.01
